# Supplementary material for: The co-occurrence of myocardial dysfunction and peripheral insensate neuropathy in a streptozotocin-induced rat model of diabetes
Source: PubMed Central journal article supplement (PMC3893387; doi:10.1186/1475-2840-13-11), 2014-01-11

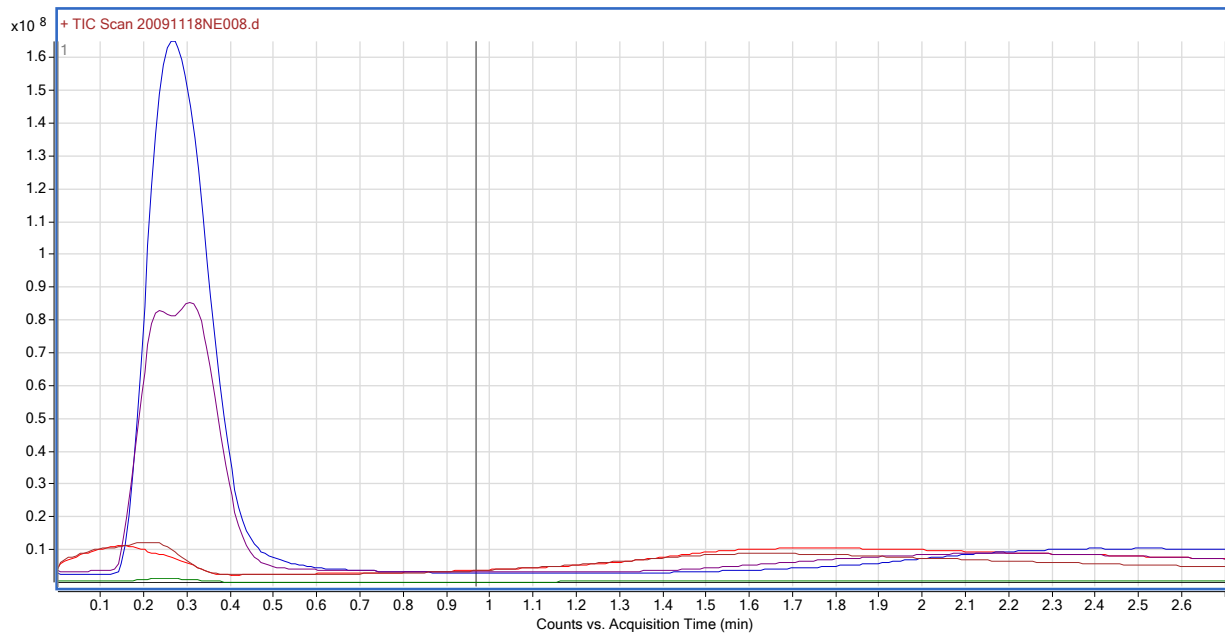

Supplement: 1475-2840-13-11-S1.pdf [file 1475-2840-13-11-S1.pdf]
